# Supplementary material
Source: publisher figshare collection journal article supplement (https://rs.figshare.com/ndownloader/files/26474589)
Supplement: Supplementary file 1 [file 26474589]

Selection	Unique Identifier for each call
File.Offset..s.	Number of seconds into the file the call occurred
Longitude	Longitude
Latitude	Latitude
East..m.	Distance from hydrophone (m) to the east
North..m.	Distance from hydrophone (m) to the North
Bearing..deg.	Degree orientation from hydrophone (degrees)
Range..m.	Range from hydrohpne array center (m)
East.Std..Dev..m.	Standard deviation of location to east (m)
North.Std..Dev..m.	Standard deviation of location to north(m)
Range.Std..Dev..m.	Standard deviation of range (m)
Inband_Call	dB RMS in the bandwidth of the call
Inband_Noise	dB RMS 100-900 Hz
Distance	Distance (m) between caller and nearet hydrophone
SL	Source Level (dB RMS re 1 uPa in the bandwidth of the call
excess	Source level - inband noise
predictFinal	Predicted SL based on model output
upperCI	Upper confidence interval based on model output
lowerCI	Lower confidence interval based on model output
predictFinalX	Predicted signal excess based on model output
upperCIX	Predicted upper confidence interval of excess model based on model output
lowerCIX	Predicted lower confidence interval of excess model based on model outpud
AN_round	Ambient noises bins (5dB bins)
